# Supplementary material for: Selected Parameters of Bone Turnover in Neuroendocrine Tumors—A Potential Clinical Use?
Source: MDPI journal article supplement (doi:10.3390/jcm12144608), 2023-07-11
Supplement: s1 [file s1]

Supplementary Table S1a. Spearman correlation coefficients (r<sub>s</sub>) and probability value (p) for the parameters studied in the study group.

| Study group           | Age            |       | BMI            |       | Chromogranin A |       | Serotonin      |       | 5-HIAA         |       | Glucose        |       | Total cholesterol |       | Triglycerides  |       | Osteocalcin    |       | Osteoprotegerin |       | IGFBP-3        |       | Histological Grading |       | Clinical stage (I-IV) |       | Ki-67          |       |
|-----------------------|----------------|-------|----------------|-------|----------------|-------|----------------|-------|----------------|-------|----------------|-------|-------------------|-------|----------------|-------|----------------|-------|-----------------|-------|----------------|-------|----------------------|-------|-----------------------|-------|----------------|-------|
|                       | r <sub>s</sub> | p     | r <sub>s</sub>    | p     | r <sub>s</sub> | p     | r <sub>s</sub> | p     | r <sub>s</sub>  | p     | r <sub>s</sub> | p     | r <sub>s</sub>       | p     | r <sub>s</sub>        | p     | r <sub>s</sub> | p     |
| Age                   | 1.00           | 0.000 | 0.20           | 0.118 | 0.08           | 0.527 | -0.15          | 0.270 | -0.01          | 0.921 | 0.15           | 0.251 | 0.11              | 0.421 | -0.03          | 0.807 | 0.10           | 0.458 | 0.48            | 0.000 | -0.35          | 0.031 | 0.06                 | 0.703 | 0.26                  | 0.044 | -0.10          | 0.455 |
| BMI                   | 0.20           | 0.118 | 1.00           | 0.000 | -0.23          | 0.081 | -0.08          | 0.568 | 0.13           | 0.318 | 0.18           | 0.181 | 0.04              | 0.786 | 0.25           | 0.058 | -0.25          | 0.051 | -0.14           | 0.302 | 0.22           | 0.177 | -0.35                | 0.017 | -0.12                 | 0.372 | -0.47          | 0.000 |
| Chromogranin A        | 0.08           | 0.527 | -0.23          | 0.081 | 1.00           | 0.000 | 0.32           | 0.015 | 0.35           | 0.008 | 0.12           | 0.367 | -0.36             | 0.006 | -0.04          | 0.778 | 0.06           | 0.649 | 0.42            | 0.001 | 0.17           | 0.293 | 0.22                 | 0.143 | 0.43                  | 0.001 | 0.10           | 0.467 |
| Serotonin             | -0.15          | 0.270 | -0.08          | 0.568 | 0.32           | 0.015 | 1.00           | 0.000 | 0.31           | 0.018 | 0.01           | 0.952 | -0.25             | 0.061 | 0.05           | 0.692 | 0.20           | 0.141 | -0.04           | 0.774 | -0.05          | 0.770 | 0.10                 | 0.511 | 0.19                  | 0.157 | 0.00           | 0.980 |
| 5-HIAA                | -0.01          | 0.921 | 0.13           | 0.318 | 0.35           | 0.008 | 0.31           | 0.018 | 1.00           | 0.000 | 0.13           | 0.341 | -0.35             | 0.008 | -0.19          | 0.147 | 0.00           | 0.988 | -0.06           | 0.678 | 0.16           | 0.338 | -0.05                | 0.747 | 0.28                  | 0.029 | -0.07          | 0.599 |
| Glucose               | 0.15           | 0.251 | 0.18           | 0.181 | 0.12           | 0.367 | 0.01           | 0.952 | 0.13           | 0.341 | 1.00           | 0.000 | -0.04             | 0.748 | 0.20           | 0.131 | 0.02           | 0.870 | 0.25            | 0.052 | 0.10           | 0.542 | 0.37                 | 0.010 | 0.16                  | 0.236 | 0.19           | 0.156 |
| Total cholesterol     | 0.11           | 0.421 | 0.04           | 0.786 | -0.36          | 0.006 | -0.25          | 0.061 | -0.35          | 0.008 | -0.04          | 0.748 | 1.00              | 0.000 | 0.25           | 0.060 | -0.14          | 0.312 | -0.16           | 0.218 | -0.14          | 0.401 | -0.09                | 0.548 | -0.17                 | 0.189 | -0.10          | 0.436 |
| Triglycerides         | -0.03          | 0.807 | 0.25           | 0.058 | -0.04          | 0.778 | 0.05           | 0.692 | -0.19          | 0.147 | 0.20           | 0.131 | 0.25              | 0.060 | 1.00           | 0.000 | -0.08          | 0.559 | 0.07            | 0.586 | 0.41           | 0.012 | 0.18                 | 0.234 | 0.00                  | 0.986 | 0.05           | 0.706 |
| Osteocalcin           | 0.10           | 0.458 | -0.25          | 0.051 | 0.06           | 0.649 | 0.20           | 0.141 | 0.00           | 0.988 | 0.02           | 0.870 | -0.14             | 0.312 | -0.08          | 0.559 | 1.00           | 0.000 | -0.05           | 0.714 | -0.25          | 0.132 | 0.09                 | 0.559 | 0.04                  | 0.745 | 0.20           | 0.133 |
| Osteoprotegerin       | 0.48           | 0.000 | -0.14          | 0.302 | 0.42           | 0.001 | -0.04          | 0.774 | -0.06          | 0.678 | 0.25           | 0.052 | -0.16             | 0.218 | 0.07           | 0.586 | -0.05          | 0.714 | 1.00            | 0.000 | -0.17          | 0.306 | 0.28                 | 0.054 | 0.47                  | 0.000 | 0.07           | 0.587 |
| IGFBP-3               | -0.35          | 0.031 | 0.22           | 0.177 | 0.17           | 0.293 | -0.05          | 0.770 | 0.16           | 0.338 | 0.10           | 0.542 | -0.14             | 0.401 | 0.41           | 0.012 | -0.25          | 0.132 | -0.17           | 0.306 | 1.00           | 0.000 | 0.12                 | 0.516 | 0.02                  | 0.889 | 0.04           | 0.831 |
| Histological Grading  | 0.06           | 0.703 | -0.35          | 0.017 | 0.22           | 0.143 | 0.10           | 0.511 | -0.05          | 0.747 | 0.37           | 0.010 | -0.09             | 0.548 | 0.18           | 0.234 | 0.09           | 0.559 | 0.28            | 0.054 | 0.12           | 0.516 | 1.00                 | 0.000 | 0.36                  | 0.014 | 0.77           | 0.000 |
| Clinical stage (I-IV) | 0.26           | 0.044 | -0.12          | 0.372 | 0.43           | 0.001 | 0.19           | 0.157 | 0.28           | 0.029 | 0.16           | 0.236 | -0.17             | 0.189 | 0.00           | 0.986 | 0.04           | 0.745 | 0.47            | 0.000 | 0.02           | 0.889 | 0.36                 | 0.014 | 1.00                  | 0.000 | 0.09           | 0.495 |
| Ki-67                 | -0.10          | 0.455 | -0.47          | 0.000 | 0.10           | 0.467 | 0.00           | 0.980 | -0.07          | 0.599 | 0.19           | 0.156 | -0.10             | 0.436 | 0.05           | 0.706 | 0.20           | 0.133 | 0.07            | 0.587 | 0.04           | 0.831 | 0.77                 | 0.000 | 0.09                  | 0.495 | 1.00           | 0.000 |
| Calcium               | -0.11          | 0.399 | -0.22          | 0.088 | -0.27          | 0.038 | -0.08          | 0.554 | -0.27          | 0.038 | 0.02           | 0.860 | 0.26              | 0.045 | -0.02          | 0.877 | 0.28           | 0.031 | -0.18           | 0.177 | -0.18          | 0.274 | 0.03                 | 0.823 | -0.28                 | 0.028 | 0.15           | 0.246 |
| Phosphate             | -0.14          | 0.272 | -0.22          | 0.088 | 0.03           | 0.829 | 0.02           | 0.910 | -0.27          | 0.041 | 0.00           | 0.989 | 0.11              | 0.432 | 0.23           | 0.084 | -0.15          | 0.261 | 0.07            | 0.617 | 0.10           | 0.551 | 0.28                 | 0.053 | 0.03                  | 0.793 | 0.23           | 0.080 |
| Cortisol              | 0.09           | 0.497 | 0.03           | 0.849 | 0.18           | 0.174 | -0.02          | 0.899 | 0.08           | 0.544 | 0.34           | 0.008 | 0.09              | 0.508 | 0.08           | 0.546 | 0.03           | 0.797 | 0.14            | 0.278 | 0.02           | 0.881 | -0.01                | 0.953 | 0.00                  | 0.974 | -0.06          | 0.627 |

5-HIAA - 5-hydroxyindole acetic acid.

Supplementary Table S1b. Spearman correlation coefficients ( $r_s$ ) and probability value (p) for the parameters studied in the control group.

| Control group     | Age   |       | BMI   |       | Glucose |       | Total cholesterol |       | Triglycerides |       | Osteocalcin |       | Osteoprotegerin |       | IGFBP-3 |       |
|-------------------|-------|-------|-------|-------|---------|-------|-------------------|-------|---------------|-------|-------------|-------|-----------------|-------|---------|-------|
|                   | $r_s$ | p     | $r_s$ | p     | $r_s$   | p     | $r_s$             | p     | $r_s$         | p     | $r_s$       | p     | $r_s$           | p     | $r_s$   | p     |
| Age               | 1.00  | 0.000 | 0.20  | 0.282 | 0.77    | 0.000 | 0.08              | 0.661 | 0.58          | 0.001 | -0.25       | 0.115 | 0.26            | 0.124 | -0.18   | 0.156 |
| BMI               | 0.20  | 0.282 | 1.00  | 0.000 | 0.16    | 0.395 | 0.37              | 0.044 | 0.47          | 0.008 | 0.56        | 0.089 | -0.36           | 0.308 | -0.41   | 0.020 |
| Glucose           | 0.77  | 0.000 | 0.16  | 0.395 | 1.00    | 0.000 | -0.16             | 0.390 | 0.46          | 0.010 | -0.60       | 0.067 | 0.70            | 0.024 | -0.14   | 0.440 |
| Total cholesterol | 0.08  | 0.661 | 0.37  | 0.044 | -0.16   | 0.390 | 1.00              | 0.000 | 0.36          | 0.051 | -0.50       | 0.141 | 0.00            | 1.000 | -0.24   | 0.206 |
| Triglycerides     | 0.58  | 0.001 | 0.47  | 0.008 | 0.46    | 0.010 | 0.36              | 0.051 | 1.00          | 0.000 | -0.30       | 0.400 | 0.60            | 0.067 | -0.10   | 0.599 |
| Osteocalcin       | -0.25 | 0.115 | 0.56  | 0.089 | -0.60   | 0.067 | -0.50             | 0.141 | -0.30         | 0.400 | 1.00        | 0.000 | 0.04            | 0.839 | 0.48    | 0.002 |
| Osteoprotegerin   | 0.26  | 0.124 | -0.36 | 0.308 | 0.70    | 0.024 | 0.00              | 1.000 | 0.60          | 0.067 | 0.04        | 0.839 | 1.00            | 0.000 | -0.05   | 0.751 |
| IGFBP-3           | -0.18 | 0.156 | -0.41 | 0.020 | -0.14   | 0.440 | -0.24             | 0.206 | -0.10         | 0.599 | 0.48        | 0.002 | -0.05           | 0.751 | 1.00    | 0.000 |
